# Supplementary material for: Antioxidants and Bioactive Compounds in Licorice Root Extract Potentially Contribute to Improving Growth, Bulb Quality and Yield of Onion (Allium cepa)
Source: MDPI journal article supplement (doi:10.3390/molecules26092633), 2021-04-30
Supplement: s1 [file s1]

# Antioxidants and Bioactive Compounds in Licorice Root Extract Potentially Contribute to Improving Growth, Bulb Quality and Yield of Onion (*Allium cepa*)

## Supplementary Material

**Table S1.** The mean physical and chemical properties of the soil of the experimental site.

| Physical properties | Sand (%)              |     |     | Silt (%)          |                                     |                 | Clay (%)         |                 |                | Texture class   |     |                |                               |                  |
|---------------------|-----------------------|-----|-----|-------------------|-------------------------------------|-----------------|------------------|-----------------|----------------|-----------------|-----|----------------|-------------------------------|------------------|
|                     | 25.5                  |     |     | 39.8              |                                     |                 | 34.7             |                 |                | Clay loam       |     |                |                               |                  |
| Chemical properties | EC                    | pH  | OM  | CaCO <sub>3</sub> | Soluble ions (meq L <sup>-1</sup> ) |                 |                  |                 |                | Available (ppm) |     |                |                               |                  |
|                     | (dS m <sup>-1</sup> ) |     | (%) | (%)               | HCO <sub>3</sub> <sup>-</sup>       | Cl <sup>-</sup> | Mg <sup>2+</sup> | Na <sup>+</sup> | K <sup>+</sup> | N               | P   | K <sup>+</sup> | SO <sub>4</sub> <sup>2-</sup> | Ca <sup>2+</sup> |
|                     | 1.2                   | 7.6 | 1.2 | 2.7               | 2.41                                | 2.2             | 1.9              | 6.2             | 0.21           | 62.4            | 9.2 | 356            | 6.6                           | 4.3              |

**Abbreviations:** EC, electrical conductivity; meq L<sup>-1</sup>, milliequivalent per liter; OM, organic matter.
